# Supplementary material
Source: PubMed Central journal article supplement (PMC3920583)
Supplement: NIHMS204325-supplement-01.pdf [file NIHMS204325-supplement-01.pdf]

## Supplementary materials

**Supplementary Fig. 1.** American ginseng-mediated cytotoxicity in H9C2 cells. H9C2 cells at 80-90% confluence were cultured in serum-free DMEM for 24 hours, and then treated with or without American ginseng extract (Am. g.) in serum-free DMEM as indicated for additional 24 hours. LDH release and cell survival were assessed by the Cytotoxicity Detection Kit <sup>PLUS</sup>. Cell viability = (LDH activity of cell lysate)/(LDH activity of cell lysate + LDH activity of culture media) × 100%. \*p < 0.05 vs Am. g. (0), n=4. (A) American ginseng-induced LDH release into supernatant of H9C2 cells. (B) American ginseng-induced cell death of H9C2 cells. Serum starvation induced 30% of cell death in H9C2 cells.

**Supplementary Fig. 2.** American ginseng-induced Nrf2 nuclear translocation in H9C2 cells. H9C2 cells at 80-90% confluence were cultured in serum-free DMEM for 24 hours, and then treated with or without American ginseng extract (Am. g.) in serum-free DMEM as indicated. Nuclear fractions were prepared using NE-PER Nuclear and Cytoplasmic Extraction Reagents (Pierce) following the manufacturer's instructions. Nuclear fractions were confirmed by the immunoblotting of histone using anti-Histone H3 (FL-136, sc-10809, Santa Cruz). Nuclear Nrf2 was assessed by the immunoblotting of Nrf2 using an antibody of Nrf2 (H-300, sc-13032, Santa Cruz). Results are representatives of duplicated experiments.

**Supplementary Fig. 3.** Effect of Nrf2 knockdown on American ginseng-mediated suppression of ROS and RNS formation in H9C2 cells. Cells infected with adenovirus of control scramble shRNA or Nrf2 shRNA for 48 hours, and then treated with TNF $\alpha$  (100 ng/ml) and American ginseng extract (Am. g., 200  $\mu$ g/ml) for 1 hour. Free radical formation was determined as described in “*Methods*” \*p < 0.05 vs Ad-scramble (-); #p < 0.05 vs Ang II (+) of Ad-scramble; § p < 0.05 vs Ang (+) of Ad-Nrf2 shRNA; †p < 0.05 vs Ad-Nrf2 shRNA (-); n=6.

**Supplementary Table 1.** Primers for Q-PCR.

**Supplementary Table 2.** Primers for CHIP assay.

**Supplementary Table 3.** Cells were stimulated with or without American ginseng extract (Am. g., 50  $\mu$ g/ml) for 12 hours and subjected to CHIP assay as described in “*Methods*”. A, p < 0.05 vs vehicle, n=4. ns, non-significant.

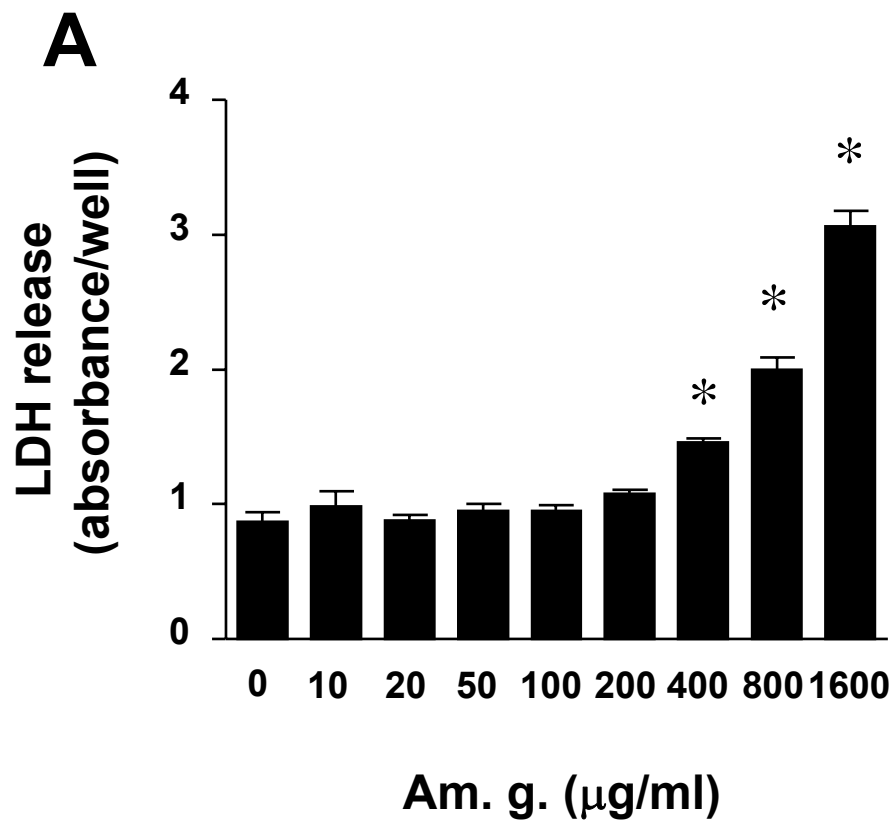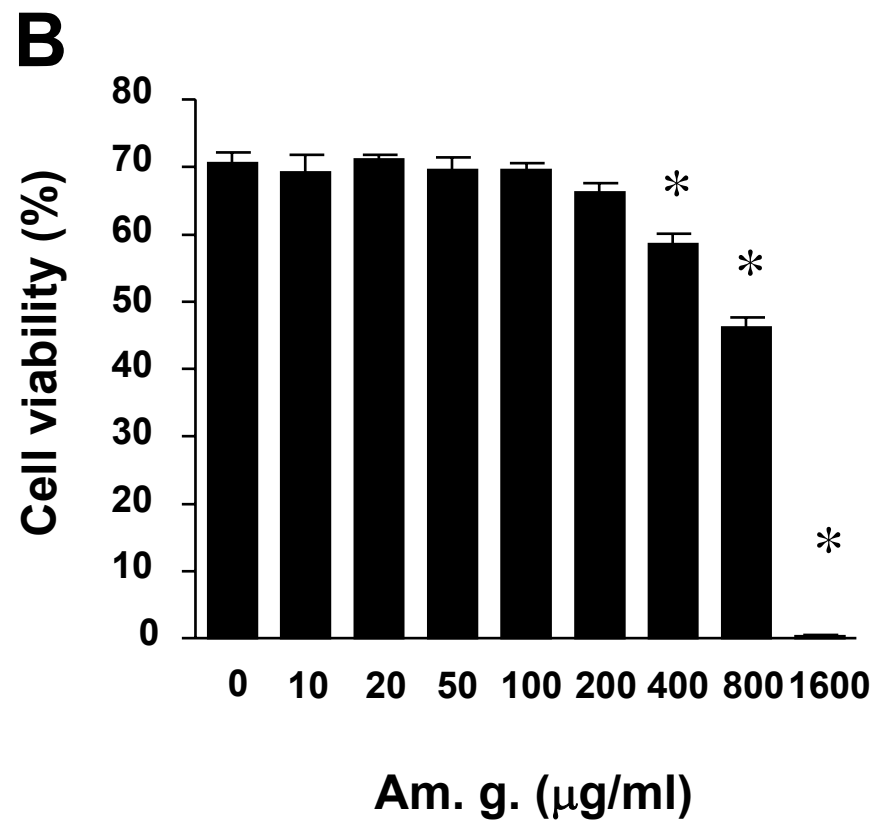

**Nuclear fraction**

**American ginseng (10  $\mu$ g/ml)**

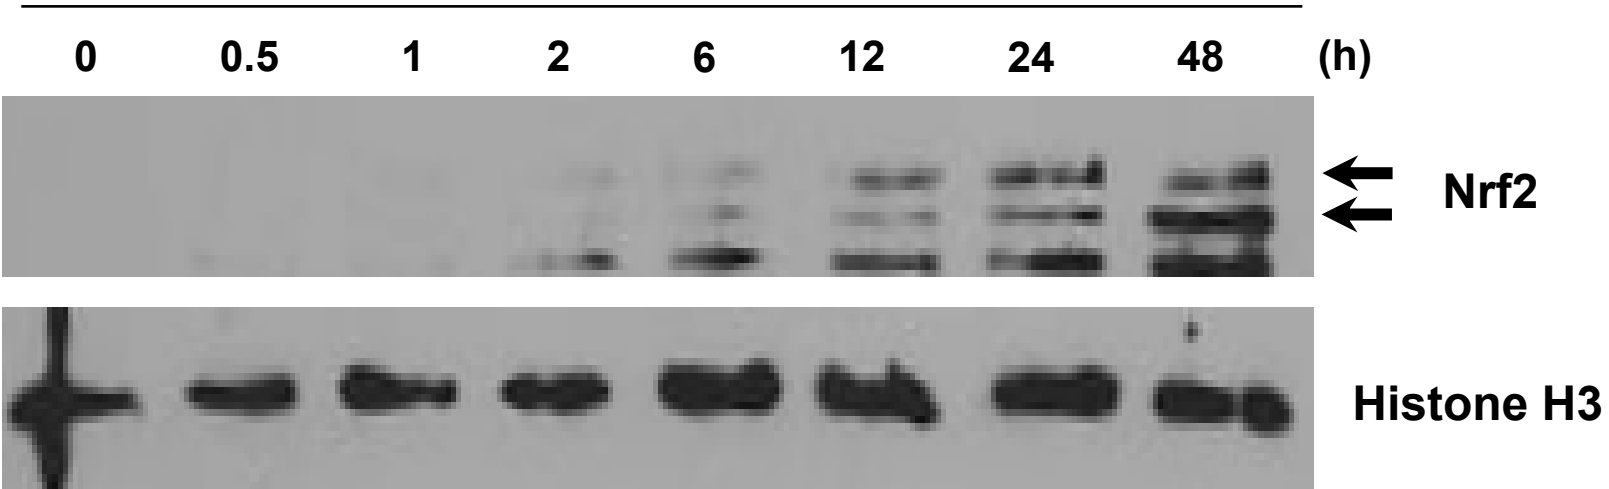

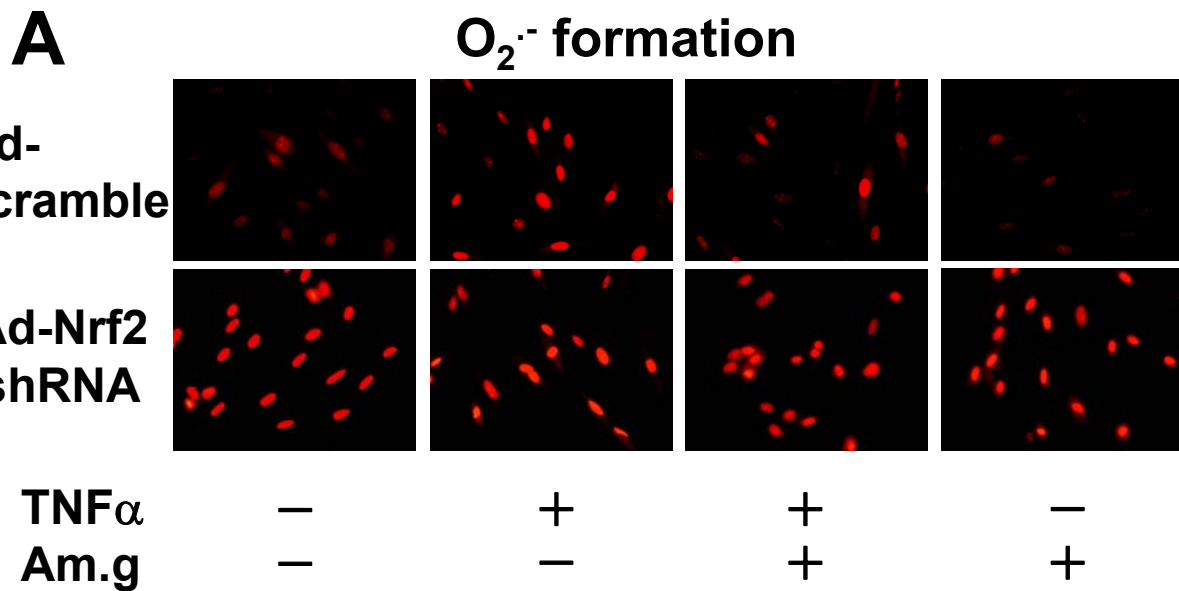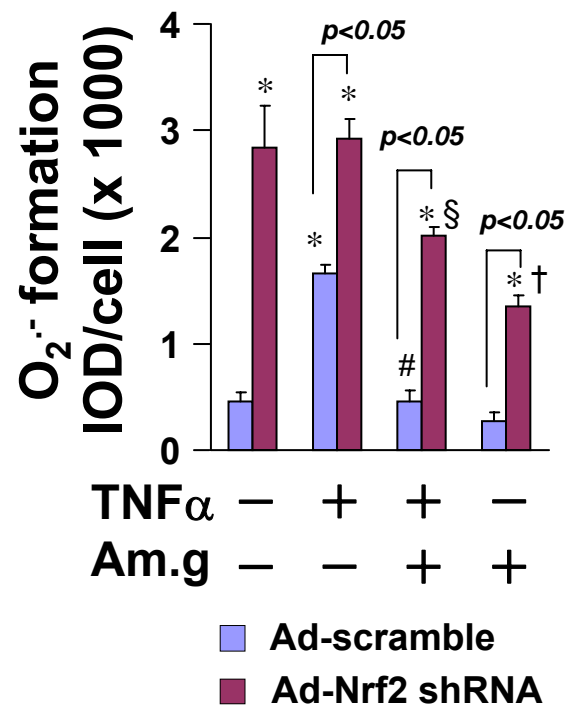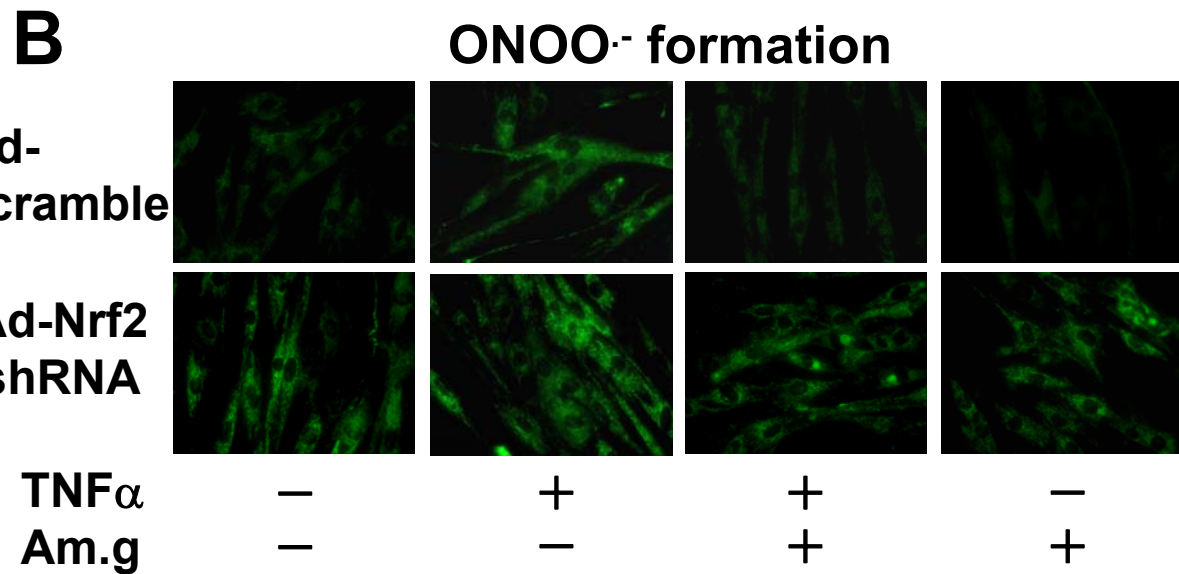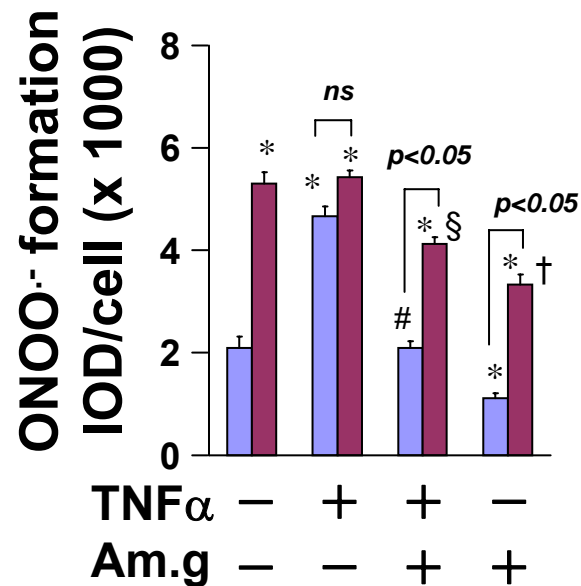

Supplementary Fig. 3

## Supplementary Table 1. Primers for Q-PCR

| Gene    | Species | Accession No.  | 5' primer                | 3' primer                | PCR product size |
|---------|---------|----------------|--------------------------|--------------------------|------------------|
| NQO-1   | Rat     | NM_017000.3    | ACTACGATCCGCCCCCAACTTCTG | CTTCGGCTCCCCTGTGATGTCGT  | 212              |
| HO-1    | Rat     | NM_012580.2    | TCCTGCGATGGGTCCTCACACTC  | CAGCCGCCTCTACCGACCACAG   | 340              |
| GCLc    | Rat     | NM_012815.2    | TTGTTACTGAATGGCGGCGATGTT | GCGGGGGTGCTTGTTTATGG     | 357              |
| SOD-2   | Rat     | NM_017051.2    | GGACGCCGCAGAGCAGAC       | GCCCCGCCATTGAACTT        | 360              |
| Txn-1   | Rat     | NM_053800.3    | CTGATCGAGAGCAAGGAAGC     | CAGAGCATGATTAGGCAAAC     | 319              |
| Txnrd-1 | Rat     | NM_031614.2    | AGTGGTTGGCGCGTCCTATGTC   | TTCACGCCACGGTCTCTAAGC    | 342              |
| HO-1    | Mouse   | NM_010442.2    | AGGAGATAGAGCGCAACAAGCAGA | CCAGTGAGGCCCATACCAGAAG   | 116              |
| NQO-1   | Mouse   | NM_008706.5    | CGGTATTACGATCCTCCCTCAACA | AGCCTCTACAGCAGCCTCCTTCAT | 120              |
| Trxnd-1 | Mouse   | NM_001042523.1 | GTGTTGCTGGCGGTAGGAAGAGAT | GTCACCGATGGCGTAGATGTAAGG | 144              |

**Supplementary Table 2. Primers for ChIP assay**

| <b>Gene</b>  | <b>ARE location</b>    | <b>5' primer</b>                | <b>3' primer</b>                | <b>PCR product size</b> |
|--------------|------------------------|---------------------------------|---------------------------------|-------------------------|
| <b>NQO-1</b> | <b>-468 ~ -459</b>     | <b>GATCTTGGACAGGGAGCAGTTGAA</b> | <b>ATTGGCAGGGAGAAGCAGTTTAGG</b> | <b>143</b>              |
|              | <b>-4683 ~ -4674</b>   | <b>CCTGGCCTGGGAACACTGA</b>      | <b>TCTTGGCCTATAAAACACATCCTG</b> | <b>181</b>              |
|              | <b>-5449 ~ -5440</b>   | <b>CAAACACTGCCAACCTG</b>        | <b>AGCTAAATCCCCAACCCCTGTGT</b>  | <b>182</b>              |
| <b>SOD-2</b> | <b>-886 ~ -877</b>     | <b>GCTGCGGCTATCAAATGTT</b>      | <b>GCAAAGGGGGTGGGAAAAA</b>      | <b>158</b>              |
|              | <b>-3723 ~ -3714</b>   | <b>CTGAGGGCAAGAGAAAAGAGAT</b>   | <b>TACCCCTAAGTGAGTCCATTGAT</b>  | <b>164</b>              |
|              | <b>-11188 ~ -11179</b> | <b>AGGATGTCTGCGATGGCTATTCT</b>  | <b>GTCTCCCCAGTTCTAACGATTCAA</b> | <b>124</b>              |
|              | <b>-19099 ~ -19090</b> | <b>CTGGGAACTCCTGCGTCTCT</b>     | <b>ATGGGCTTCGTTGTATCTTTCTG</b>  | <b>173</b>              |
| <b>Txn-1</b> | <b>-3769 ~ -3760</b>   | <b>GACAAGGCAAATCACAGAC</b>      | <b>ACACATACACATACATACATCC</b>   | <b>165</b>              |
|              | <b>-11405 ~ -11396</b> | <b>GGCCCTCTGCTGGAAAAG</b>       | <b>AGCACGGTCACTACTACG</b>       | <b>151</b>              |
|              | <b>-11423 ~ -11414</b> | <b>GGCCCTCTGCTGGAAAAG</b>       | <b>AGCACGGTCACTACTACG</b>       | <b>151</b>              |
|              | <b>-11584 ~ -11575</b> | <b>GGCCCTCTGCTGGAAAAG</b>       | <b>AGCACGGTCACTACTACG</b>       | <b>151</b>              |
|              | <b>-19433 ~ -19424</b> | <b>TGGCACAGTTCTAAGGATTCATTC</b> | <b>CGGTGGTTATACGGTTTTGTTCTA</b> | <b>96</b>               |
|              | <b>-22521 ~ -22512</b> | <b>CCGCCTTCCTGTTCTGCTCTC</b>    | <b>TAAATGGGTGGGTATGGAACAAG</b>  | <b>87</b>               |

### Supplementary Table 3. CHIP analysis of direct binding of Nrf2 to ARE on its target gene promoters

| Gene  | ARE location    | direction | Chip assay   |              | <i>p</i> |
|-------|-----------------|-----------|--------------|--------------|----------|
|       |                 |           | Vehicle      | Am. g.       |          |
| NQO-1 | -468 ~ -459     | 5'→3'     | 1.00 ± 0.045 | 1.76 ± 0.141 | A        |
|       | -4683 ~ -4674   | 3'→5'     | 0.99 ± 0.340 | 36.6 ± 12.42 | A        |
|       | -5449 ~ -5440   | 3'→5'     | 0.99 ± 0.361 | 9.00 ± 1.803 | A        |
| SOD-2 | -886 ~ -877     | 3'→5'     | 1.07 ± 0.110 | 1.72 ± 0.251 | A        |
|       | -3723 ~ -3714   | 5'→3'     | 0.90 ± 0.075 | 2.23 ± 0.237 | A        |
|       | -11188 ~ -11179 | 5'→3'     | 0.87 ± 0.145 | 0.82 ± 0.122 | ns       |
|       | -19099 ~ -19090 | 5'→3'     | 0.91 ± 0.102 | 1.22 ± 0.176 | ns       |
| Txn-1 | -3769 ~ -3760   | 3'→5'     | 1.04 ± 0.631 | 12.4 ± 3.893 | A        |
|       | -11405 ~ -11396 | 5'→3'     | 1.22 ± 0.214 | 4.01 ± 0.265 | A        |
|       | -11423 ~ -11414 | 5'→3'     | 1.22 ± 0.214 | 4.01 ± 0.265 | A        |
|       | -11584 ~ -11575 | 3'→5'     | 1.22 ± 0.214 | 4.01 ± 0.265 | A        |
|       | -19433 ~ -19424 | 3'→5'     | 1.07 ± 0.110 | 1.72 ± 0.251 | A        |
|       | -22521 ~ -22512 | 3'→5'     | 0.93 ± 0.579 | 2.10 ± 0.995 | ns       |
